# Supplementary material for: Patterns of gene evolution following duplications and speciations in vertebrates
Source: PubMed Central journal article supplement (PMC7120047; doi:10.7717/peerj.8813), 2020-03-31

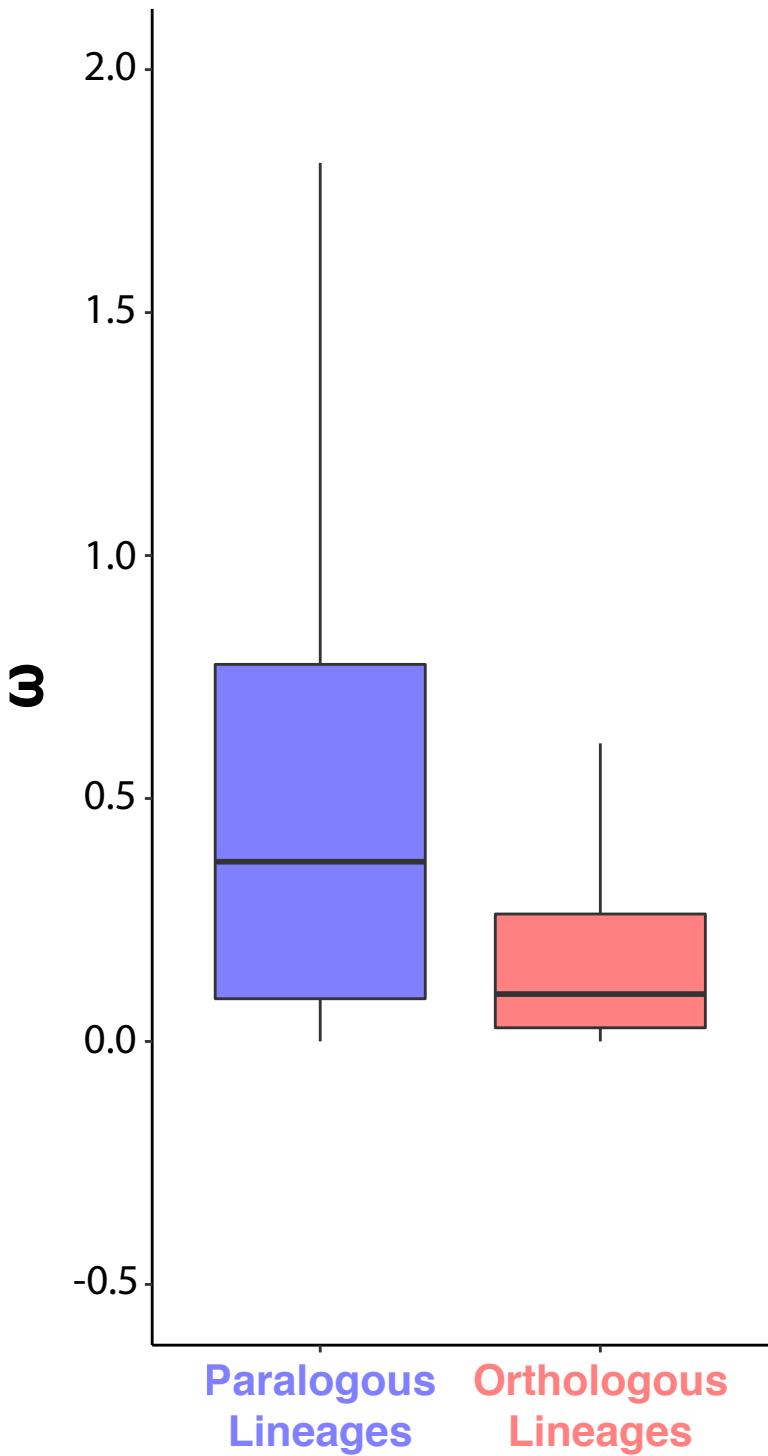

Supplement: peerj-08-8813-s004.pdf [file peerj-08-8813-s004.pdf]
