# Supplementary material for: Patterns of gene evolution following duplications and speciations in vertebrates
Source: PeerJ. 2020 Mar 31;8:e8813. doi: 10.7717/peerj.8813 (PMC7120047; doi:10.7717/peerj.8813)
Supplement: Supplemental Information 1 [file peerj-08-8813-s001.xlsx]

## Sheet: TableS1
Target Taxa			Outgroup
Common name	Scientific name	Taxon ID	Common name	Scientific name	Taxon ID
Algerian mouse	Mus spretus	10096	C.intestinalis	Ciona intestinalis	7719
Alpaca	Vicugna pacos	30538	C.savignyi	Ciona savignyi	51511
Amazon molly	Poecilia formosa	48698	C. elegans	Caenorhabditis elegans	6239
Anole lizard	Anolis carolinensis	28377	Fruitfly	Drosophila melanogaster	7227
Armadillo	Dasypus novemcinctus	9361	S. cerevisiae	Saccharomyces cerevisiae	4932
Brazilian guinea pig	Cavia aperea	37548	Lamprey	Petromyzon marinus	7757
Bushbaby	Otolemur garnettii	30611
Cat	Felis catus	9685
Cave fish	Astyanax mexicanus	7994
Chicken	Gallus gallus	9031
Chimpanzee	Pan troglodytes	9598
Chinese hamster	Cricetulus griseus	10029
Chinese softshell turtle	Pelodiscus sinensis	13735
Cod	Gadus morhua	8049
Coelacanth	Latimeria chalumnae	7897
Cow	Bos taurus	9913
Damara mole rat	Fukomys damarensis	885580
Degu	Octodon degus	10160
Dog	Canis lupus familiaris	9615
Dolphin	Tursiops truncatus	9739
Duck	Anas platyrhynchos	8839
Elephant	Loxodonta africana	9785
Ferret	Mustela putorius furo	9669
Flycatcher	Ficedula albicollis	59894
Fugu	Takifugu rubripes	31033
Gibbon	Nomascus leucogenys	61853
Golden Hamster	Mesocricetus auratus	10036
Gorilla	Gorilla gorilla gorilla	9595
Guinea Pig	Cavia porcellus	10141
Hedgehog	Erinaceus europaeus	9365
Horse	Equus caballus	9796
Human	Homo sapiens	9606
Hyrax	Procavia capensis	9813
Kangaroo rat	Dipodomys ordii	10020
Lesser Egyptian jerboa	Jaculus jaculus	51337
Lesser hedgehog tenrec	Echinops telfairi	9371
Long-tailed chinchilla	Chinchilla lanigera	34839
Macaque	Macaca mulatta	9544
Marmoset	Callithrix jacchus	9483
Medaka	Oryzias latipes	8090
Megabat	Pteropus vampyrus	132908
Microbat	Myotis lucifugus	59463
Mouse	Mus musculus	10090
Mouse Lemur	Microcebus murinus	30608
Naked mole-rat	Heterocephalus glaber	10181
Northern American deer mouse	Peromyscus maniculatus bairdii	230844
Olive baboon	Papio anubis	9555
Opossum	Monodelphis domestica	13616
Orangutan	Pongo abelii	9601
Panda	Ailuropoda melanoleuca	9646
Pig	Sus scrofa	9823
Pika	Ochotona princeps	9978
Platyfish	Xiphophorus maculatus	8083
Platypus	Ornithorhynchus anatinus	9258
Prairie vole	Microtus ochrogaster	79684
Rabbit	Oryctolagus cuniculus	9986
Rat	Rattus norvegicus	10116
Ryukyu mouse	Mus caroli	10089
Sheep	Ovis aries	9940
Shrew	Sorex araneus	42254
Shrew mouse	Mus pahari	10093
Sloth	Choloepus hoffmanni	9358
Spotted gar	Lepisosteus oculatus	7918
Squirrel	Ictidomys tridecemlineatus	43179
Stickleback	Gasterosteus aculeatus	69293
Tarsier	Carlito syrichta	1868482
Tasmanian devil	Sarcophilus harrisii	9305
Tetraodon	Tetraodon nigroviridis	99883
Tilapia	Oreochromis niloticus	8128
Tree Shrew	Tupaia belangeri	37347
Turkey	Meleagris gallopavo	9103
Upper Galilee mountains blind mole rat	Nannospalax galili	1026970
Vervet-AGM	Chlorocebus sabaeus	60711
Wallaby	Notamacropus eugenii	9315
Xenopus	Xenopus tropicalis	8364
Zebra Finch	Taeniopygia guttata	59729
Zebrafish	Danio rerio	7955
